# Supplementary material for: Insights into the Fe3+ Doping Effects on the Structure and Electron Distribution of Cr2O3 Nanoparticles
Source: MDPI journal article supplement (doi:10.3390/nano13060980), 2023-03-08
Supplement: s1 [file s1]

# Insights into the Fe<sup>3+</sup>-doping effects on the structure and electron distribution of Cr<sub>2</sub>O<sub>3</sub> nanoparticles

Cledson Santos<sup>1,2</sup>, John M. Attah-Baah<sup>1,2</sup>, Romualdo S. Silva Junior<sup>1,2</sup>, Marcelo A. Macedo<sup>1,2</sup>, Marcos V. S. Rezende<sup>1</sup>, Robert S. Matos<sup>3</sup>, Ștefan Țălu<sup>4</sup>, Dung Nguyen Trong<sup>5, †</sup>, Simone P. A. da Paz<sup>6</sup>, Rômulo S. Angélica<sup>6</sup>, Nilson S. Ferreira<sup>1,2,7,\*</sup>

<sup>1</sup> Department of Physics, Federal University of Sergipe, 49100-000, São Cristóvão, SE, Brazil

<sup>2</sup> Laboratory of Corrosion and Nanotechnology (LCNT), Federal University of Sergipe, 49100-000, São Cristóvão, SE, Brazil

<sup>3</sup> Amazonian Materials Group, Federal University of Amapá, 68902-280, Macapá, AP, Brazil

<sup>4</sup> The Directorate of Research, Development and Innovation Management (DMCDI), Technical University of Cluj-Napoca, 15 Constantin Daicoviciu St., 400020 Cluj-Napoca, Romania

<sup>5</sup> Faculty of Physics, Hanoi National University of Education, 136 Xuan Thuy, Cau Giay, Hanoi, 100000, Vietnam

<sup>6</sup> Institute of Geosciences, Federal University of Pará, 66075-110, Belém, PA, Brazil

<sup>7</sup> PPGCA, Universidade Federal do Amapá, 68902-280, Macapá, AP, Brazil

† Correspondence: dungntdt2018@gmail.com (D.N.T.)

\* Correspondence: nilson@academico.ufs.br (N.S.F.)

**Table S1:** Crystal data and refined parameters for  $\text{Cr}_{2-x}\text{Fe}_x\text{O}_3$  ( $0.0 \leq x \leq 0.18$ ) nanoparticles obtained from X-ray diffraction.

| Parameters                         | $\text{Cr}_{2-x}\text{Fe}_x\text{O}_3$ |                 |                 |                 |
|------------------------------------|----------------------------------------|-----------------|-----------------|-----------------|
|                                    | $x = 0.0$                              | $x = 0.06$      | $x = 0.12$      | $x = 0.18$      |
| <b>Crystal system</b>              | Rhombohedral                           | Rhombohedral    | Rhombohedral    | Rhombohedral    |
| <b>Space group</b>                 | R -3c (167)                            | R -3c (167)     | R -3c (167)     | R -3c (167)     |
| <b>Lattice parameters</b>          |                                        |                 |                 |                 |
| a = b (Å)                          | 4.957243                               | 4.957635        | 4.959920        | 4.960923        |
| c (Å)                              | 13.594714                              | 13.595851       | 13.599133       | 13.598163       |
| c/a                                | 2.742394                               | 2.742407        | 2.741805        | 2.741055        |
| $\alpha = \beta$ (°)               | 90.00                                  | 90.00           | 90.00           | 90.00           |
| $\gamma$ (°)                       | 120.0                                  | 120.00          | 120.00          | 120.00          |
| Unit cell volume (Å <sup>3</sup> ) | 289.322                                | 289.392         | 289.729         | 289.825         |
| X-ray density (g/cm <sup>3</sup> ) | 5.245                                  | 5.253           | 5.261           | 5.269           |
| <b>Atomic coordinates</b>          |                                        |                 |                 |                 |
| Cr <sup>3+</sup> /Fe <sup>3+</sup> |                                        |                 |                 |                 |
| x                                  | 0                                      | 0               | 0               | 0               |
| y                                  | 0                                      | 0               | 0               | 0               |
| z                                  | 0.34765                                | 0.34702         | 0.34783         | 0.34780         |
| Biso                               | 1.82691                                | 2.04750         | 2.24590         | 1.81561         |
| Occupancy                          | 0.35246/0                              | 0.33757/0.02426 | 0.32969/0.03638 | 0.31478/0.04148 |
| Wyckoff notations                  | 12c                                    | 12c             | 12c             | 12c             |
| O <sup>2-</sup>                    |                                        |                 |                 |                 |
| x                                  | 0.31465                                | 0.31061         | 0.30636         | 0.30669         |
| y                                  | 0.00000                                | 0.00000         | 0.00000         | 0.00000         |
| z                                  | 1/4                                    | 1/4             | 1/4             | 1/4             |
| Biso                               | 0.0                                    | 0.0             | 0.0             | 0.0             |
| Occupancy                          | 0.51913                                | 0.51427         | 0.51639         | 0.51148         |
| Wyckoff notations                  | 18e                                    | 18e             | 18e             | 18e             |
| <b>Microstructure</b>              |                                        |                 |                 |                 |
| Average crystallite size (nm)      | 22.9 ± 2.8                             | 33.5 ± 4.3      | 43.2 ± 3.0      | 75.5 ± 7.7      |
| Crystallite Apparent size 010 (nm) | 22.9                                   | 31.0            | 43.5            | 77.3            |
| Crystallite Apparent size 001 (nm) | 25.1                                   | 43.5            | 47.4            | 87.5            |
| Crystallite Apparent size 100 (nm) | 18.1                                   | 29.2            | 41.4            | 68.2            |
| Microstrain <ε> ×10 <sup>-4</sup>  | 11.2 ± 2.5                             | 5.2 ± 1.7       | 5.8 ± 1.4       | 1.4 ± 0.8       |
| <b>Bond Valence Sum</b>            |                                        |                 |                 |                 |
| Cr <sup>3+</sup>                   | 2.903                                  | 3.014           | 3.102           | 3.345           |
| Fe <sup>3+</sup>                   | -                                      | 3.609           | 3.519           | 3.126           |
| O <sup>2-</sup>                    | 1.935                                  | 1.992           | 2.084           | 1.972           |
| <b>Refinement parameters</b>       |                                        |                 |                 |                 |
| R <sub>P</sub>                     | 6.20                                   | 6.14            | 5.59            | 5.40            |
| R <sub>WP</sub>                    | 7.90                                   | 7.83            | 7.15            | 6.82            |
| R <sub>Exp</sub>                   | 6.82                                   | 6.98            | 6.62            | 6.19            |
| χ <sup>2</sup>                     | 1.34                                   | 1.26            | 1.16            | 1.21            |
| R <sub>d</sub> (%)                 | 100                                    | 99.59           | 98.89           | 94.85           |

|                         |          |          |          |          |
|-------------------------|----------|----------|----------|----------|
| <b>Bond lengths (Å)</b> |          |          |          |          |
| (Cr/Fe)-O1              | 2.047(9) | 2.033(7) | 2.024(6) | 2.036(7) |
| (Cr/Fe)-O2              | 1.943(2) | 1.952(2) | 1.958(3) | 1.945(8) |
| <Cr/Fe-O>               | 1.995(6) | 1.992(9) | 1.991(5) | 1.991(3) |
| <b>Angles (degree)</b>  |          |          |          |          |
| (Cr/Fe)-O-(Cr/Fe)       | 80.3(4)  | 80.8(3)  | 82.5(4)  | 82.9(1)  |
